# Supplementary material
Source: Springer Nature journal article supplement (https://www.springermedizin.de/resource/supplementary/13054_2013_2966_MOESM5_ESM.pdf/9711958)

Figure 2

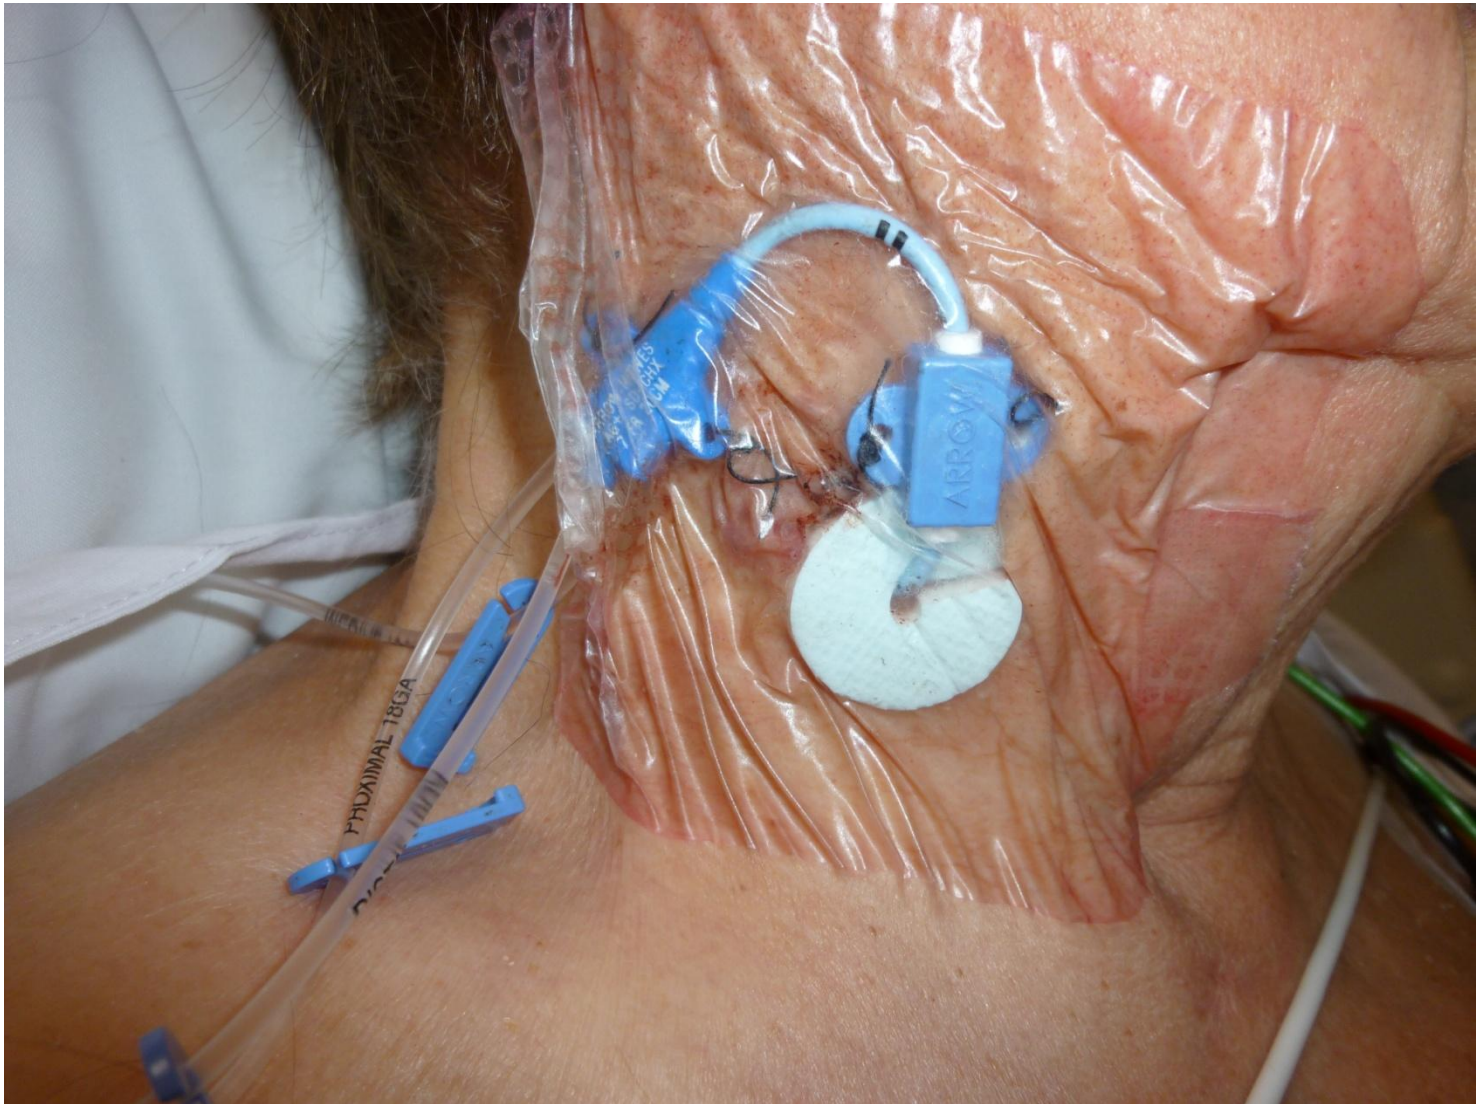

Supplement: MOESM5 [file 9711958]
